# Supplementary material
Source: MDPI journal article supplement (https://www.mdpi.com/2504-477X/7/5/188)
Supplement: s1 [file s1]

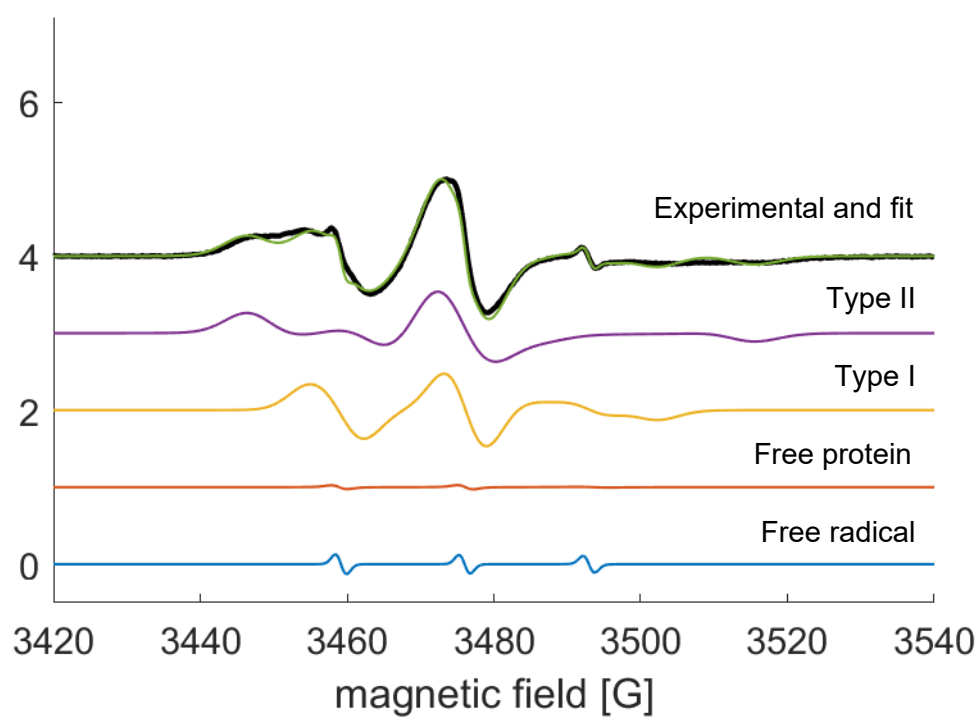

Figure S1: Experimental EPR spectrum of spin-labelled lysozyme in the composite (black), and the individual traces of the 4 components simulation shown in figure 2

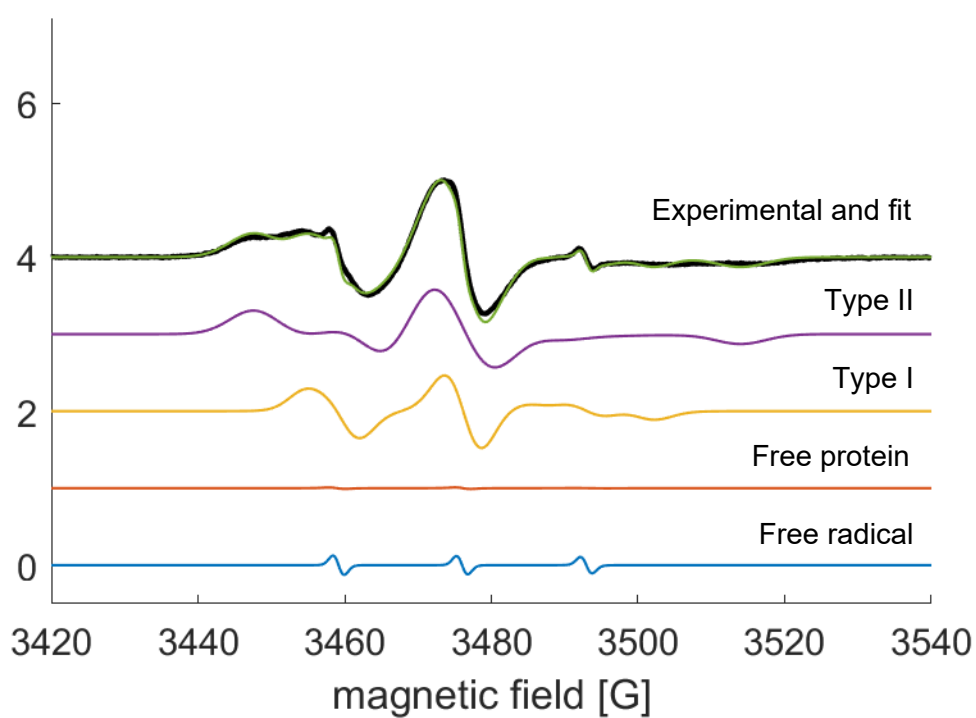

Figure S2: Experimental EPR spectrum of spin-labelled lysozyme in the composite (black), and the individual traces of the 4 components simulation (Table S1). Squared sum of the residuals 1.91

Table S1: Components used for the fit reported in Figure S2.

| Component    | Rotational Diffusion<br>coefficients ( $\times 10^6 \text{ s}^{-1}$ ) | lwpp<br>(G) | $L_x$ ( $^\circ$ ) | $L_y$ ( $^\circ$ ) | $L_z$ ( $^\circ$ ) | weight (%) |
|--------------|-----------------------------------------------------------------------|-------------|--------------------|--------------------|--------------------|------------|
| Free radical | $4.0 \cdot 10^3$                                                      | 1.5         | 0                  | 0                  | 0                  | 0.51       |
| Free protein | 22, 28, 12                                                            | 1.5         | 62                 | 34                 | 45                 | 0.13       |
| Type I       | 2.98                                                                  | 4.2         | 62                 | 34                 | 45                 | 22.1       |
| Type II      | 0.30                                                                  | 6.7         | 35                 | 16                 | 2                  | 77.3       |

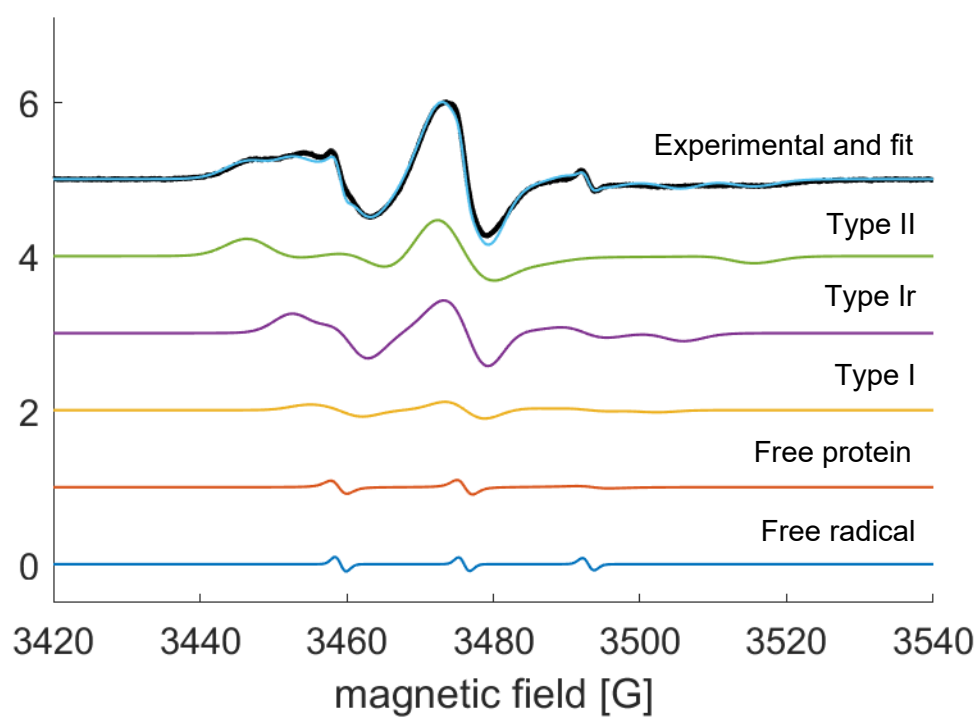

Figure S3: Experimental EPR spectrum of spin-labelled lysozyme in the composite (black), and the individual traces of the 5 components simulation shown in figure 2

```
function Tav = quasilibration(T,L)
P = sin(L).*cos(L)./L;
Tav = T;
Tav(1) = Tav(1) + 0.5*(T(3)-T(1))*(1-P(2)) +
0.5*(T(2)-T(1))*(1-P(3));
Tav(2) = Tav(2) + 0.5*(T(3)-T(2))*(1-P(1)) +
0.5*(T(1)-T(2))*(1-P(3));
Tav(3) = Tav(3) + 0.5*(T(1)-T(3))*(1-P(2)) +
0.5*(T(2)-T(3))*(1-P(1));
return
```
